# Supplementary material for: Ionic self-assembled organogel polyelectrolytes for energy storage applications
Source: Royal Society of Chemistry journal article supplement (doi:10.1039/d0ra00825g), 2020-01-01
Supplement: d0ra00825g1.pdf [file d0ra00825g1.pdf]

## Supplementary Information

### Ionic self-assembled organogel polyelectrolytes for energy storage applications

José A. Ávila-Niño<sup>a\*</sup> and Lilian I. Olvera<sup>a,b\*</sup>

- a) *CONACYT - Center of Research and Technological Development in Electrochemistry (CIDETEQ). Parque Tecnológico Querétaro, Sanfandila, Pedro Escobedo, Querétaro, C.P. 76703, Mexico. E-mail: [javila@cideteq.mx](mailto:javila@cideteq.mx)*
- b) *Instituto de Investigaciones en Materiales, Universidad Nacional Autónoma de México, Apartado Postal 70-360, CU, Coyoacán 04510, México D. F., México. E-mail: [lolvera@materiales.unam.mx](mailto:lolvera@materiales.unam.mx)*

Correspondence to:

[javila@cideteq.mx](mailto:javila@cideteq.mx)

[lolvera@materiales.unam.mx](mailto:lolvera@materiales.unam.mx)

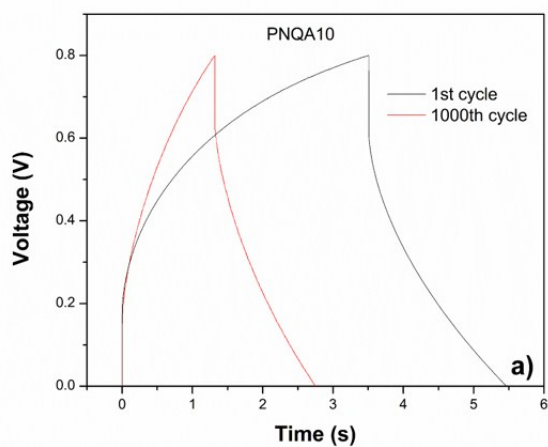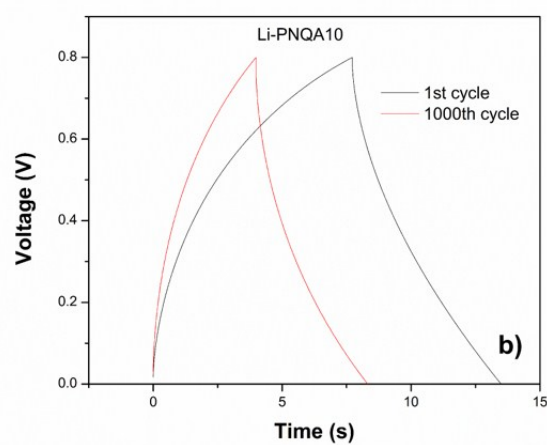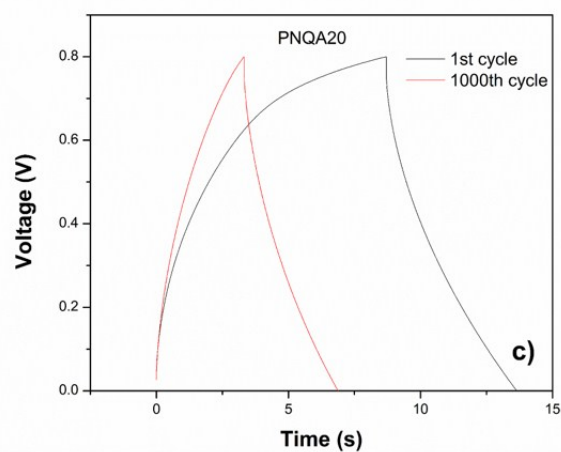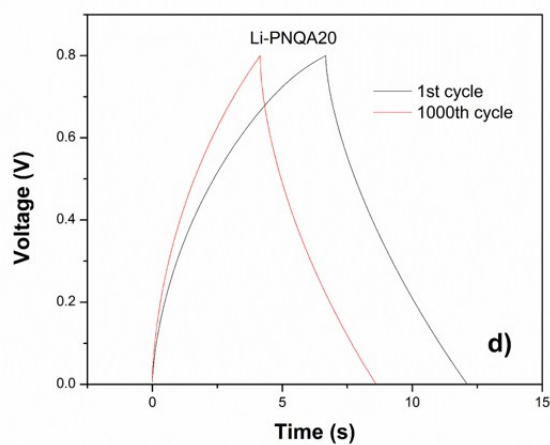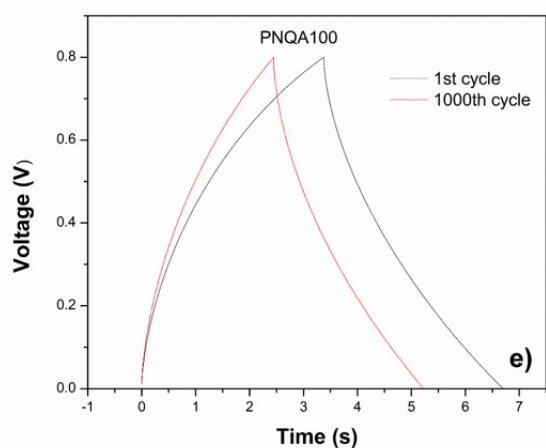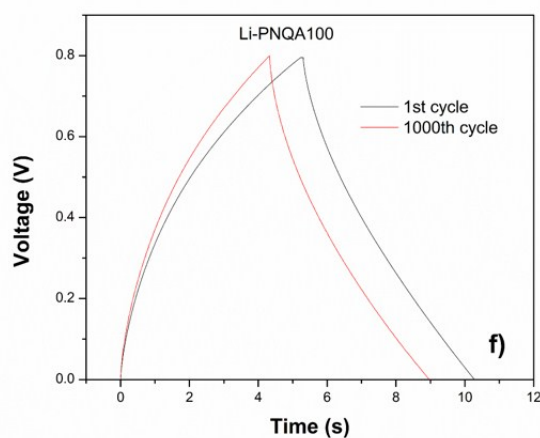

Fig S1. Stability of the supercapacitors by measuring galvanostatic charge discharge curves of the 1st and 1000th cycles for the a) PNQA10, b) Li-PNQA10, c) PNQA20, d) Li-PNQA20, e) PNQA100, f) Li-PNQA100 polyelectrolytes.
